# Supplementary material for: Post-translational regulation of the cleaved fragment of Par-4 in ovarian and endometrial cancer cells
Source: PubMed Central journal article supplement (PMC5095052; doi:10.18632/oncotarget.9235), 2016-05-09
Supplement: oncotarget-07-36971-s001.pdf [file oncotarget-07-36971-s001.pdf]

## Post-translational regulation of the cleaved fragment of Par-4 in ovarian and endometrial cancer cells

### SUPPLEMENTARY FIGURE

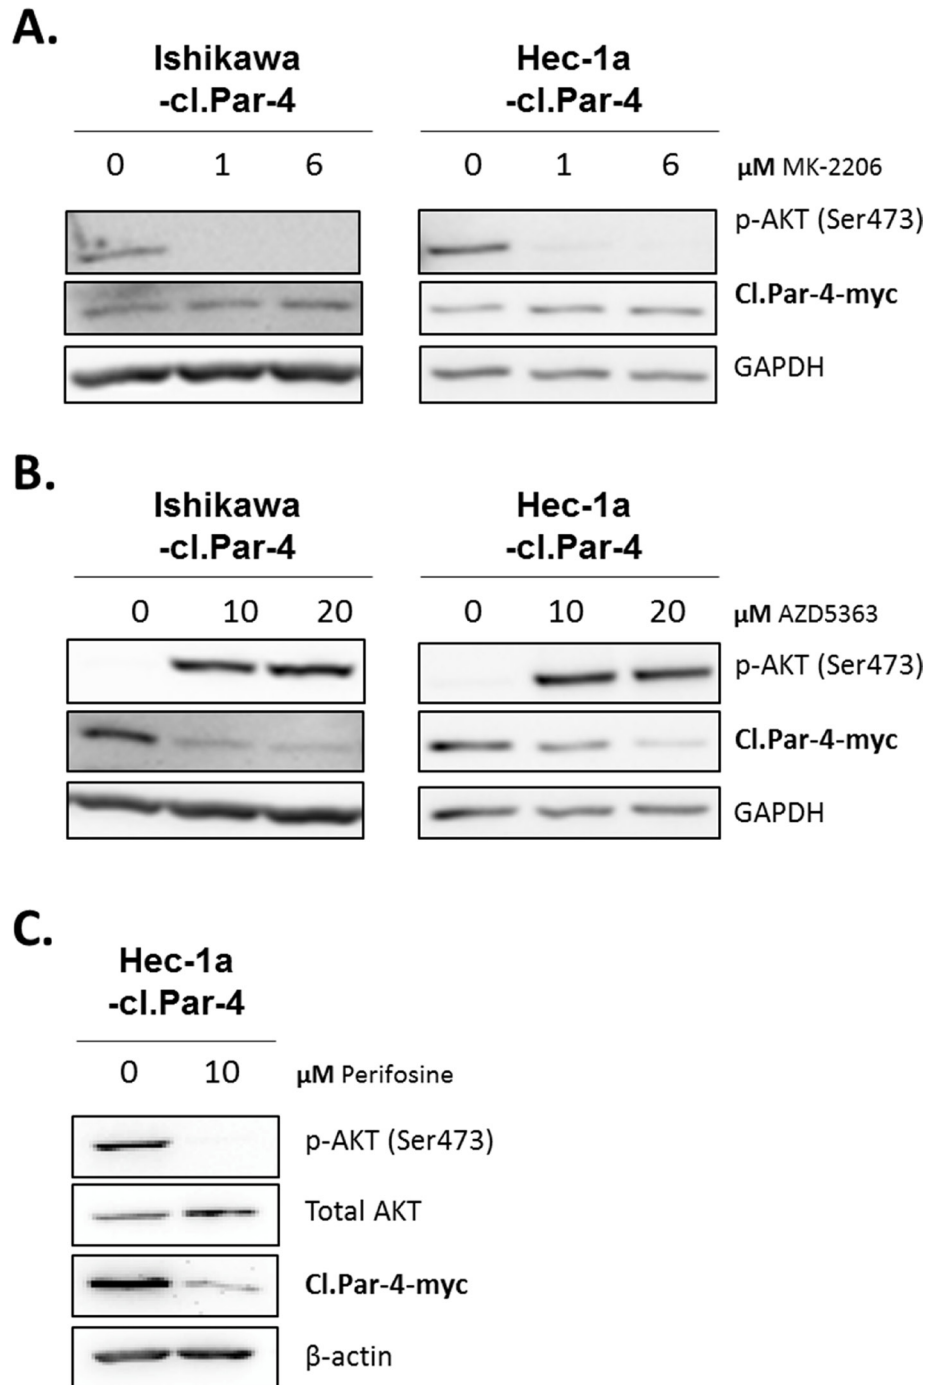

**Supplementary Figure S1: AKT inhibition does not increase cleaved-Par-4 protein level.** Cl-Par-4 cancer cells were treated with either **A.** 1 or 6 $\mu\text{M}$  AKT inhibitor (MK-2206), **B.** 10 or 20 $\mu\text{M}$  AKT inhibitor (AZD-5363) or **C.** 10 $\mu\text{M}$  of AKT inhibitor (Perifosine) for 24h. The levels of p-AKT (Ser473), total AKT and cl-Par-4-myc were determined in treated cells using western blot analysis. GAPDH or  $\beta$ -actin were used as loading controls. Results shown are representative of three independent experiments.
